# Supplementary material for: Density functional theory studies of reaction mechanisms for titanium alkylamide incorporation onto functionalized aromatic self-assembled monolayers
Source: Royal Society of Chemistry journal article supplement (doi:10.1039/b702664c), 2007-01-01
Supplement: b702664c.pdf [file b702664c.pdf]

**DENSITY FUNCTIONAL THEORY STUDIES OF REACTION MECHANISMS  
FOR TITANIUM ALKYLAMIDE INCORPORATION ONTO  
FUNCTIONALIZED AROMATIC SELF-ASSEMBLED MONOLAYERS**

**SUPPORTING INFORMATION**

Mohit Haran and Paulette Clancy\*  
School of Chemical and Biomolecular Engineering  
Cornell University  
Ithaca, NY 14853  
USA

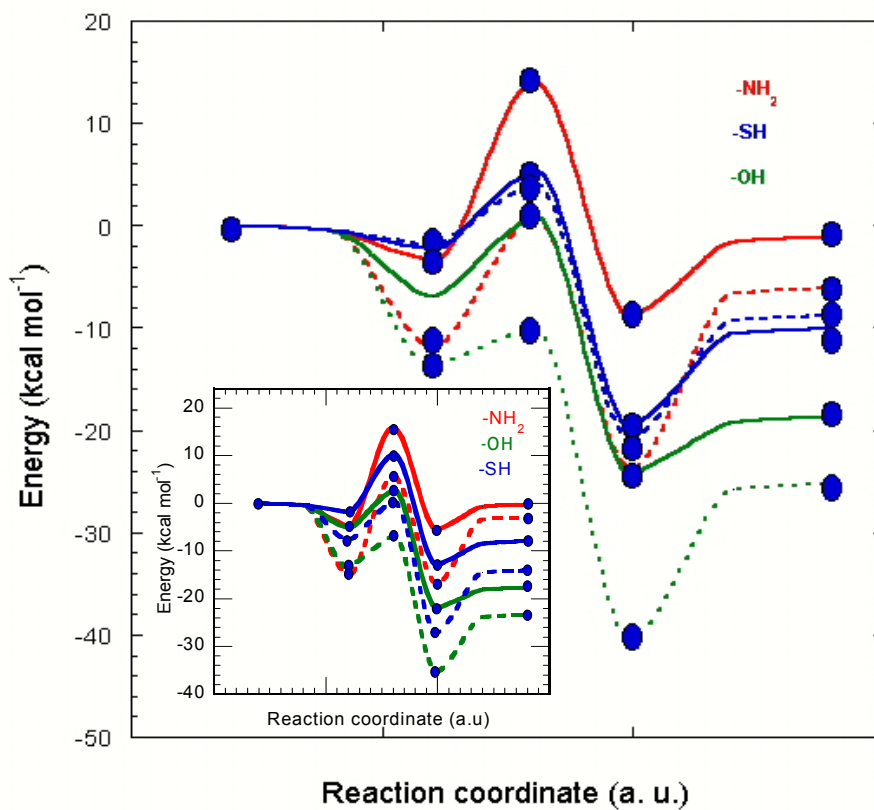

Figure S1 Potential energy diagram (PED) for reaction of Titanium tetramide on -NH<sub>2</sub>, -OH and -SH SAMs at MP2/6-311G(D)//B3LYP/6-311G(D) (dashed lines) and B3LYP/6-311++G(D,P)//B3LYP/6-311G(D)(solid lines) model chemistries. The insert represents the corresponding PED on alkyl SAMs.

Figure 2

| RXH(Terminal Group)                                              | NH <sub>2</sub> |        | OH     |        | SH     |        |
|------------------------------------------------------------------|-----------------|--------|--------|--------|--------|--------|
|                                                                  | ALKYL           | ARYL   | ALKYL  | ARYL   | ALKYL  | ARYL   |
| R=CH <sub>3</sub> CH <sub>2</sub> /C <sub>6</sub> H <sub>5</sub> |                 |        |        |        |        |        |
| Ti(NH <sub>2</sub> ) <sub>4</sub> +RXH(Vacuum)                   | 0.00            | 0.00   | 0.00   | 0.00   | 0.00   | 0.00   |
| Ti(NH <sub>2</sub> ) <sub>4</sub> ---HXR (Adduct)                | -6.82           | -11.83 | -9.43  | -13.81 | -4.44  | -7.07  |
| Ti(NH <sub>2</sub> ) <sub>4</sub> ---H--<br>XR(Transition)       | 8.96            | 0.78   | -3.40  | -9.93  | 3.71   | -1.12  |
| Ti(NH <sub>2</sub> ) <sub>3</sub> -RX--H--NH <sub>2</sub>        | -8.71           | -23.67 | -27.93 | -40.47 | -14.18 | -26.25 |
| Ti(NH <sub>2</sub> ) <sub>3</sub> RX+NH <sub>3</sub> (Product)   | -1.87           | -6.03  | -21.34 | -25.15 | -7.96  | -12.91 |

Figure 3

| XH(Terminal Group)                                                                              | NH <sub>2</sub> |        | OH     |        |
|-------------------------------------------------------------------------------------------------|-----------------|--------|--------|--------|
|                                                                                                 | B3LYP           | MP2    | B3LYP  | MP2    |
| TDMAT+RXH(Vacuum)                                                                               | 0.00            | 0.00   | 0.00   | 0.00   |
| TDMAT---HXR (Adduct)                                                                            | -2.83           | -11.46 | -5.02  | -13.91 |
| TDMAT---H--<br>XR(Transition)                                                                   | 18.06           | 3.48   | 0.28   | -9.40  |
| Ti(N(CH <sub>3</sub> ) <sub>2</sub> ) <sub>3</sub> -RX--H--<br>N(CH <sub>3</sub> ) <sub>2</sub> | -4.91           | -13.78 | -35.59 | -54.56 |
| Ti(N(CH <sub>3</sub> ) <sub>2</sub> ) <sub>3</sub> RX<br>+HN(CH <sub>3</sub> ) <sub>2</sub>     | -3.53           | -5.16  | -21.48 | -22.15 |

Figure 5

|                                                                                                 | 1Methylaniline<br>B3LYP<br>MP2 | Aniline<br>B3LYP<br>MP2 | Branched<br>Fluoryl<br>B3LYP | Isopropylaniline<br>B3LYP | Unbranched<br>B3LYP | Branched Alkylamine<br>B3LYP |
|-------------------------------------------------------------------------------------------------|--------------------------------|-------------------------|------------------------------|---------------------------|---------------------|------------------------------|
| TDMAT+RXH(Vacuum)                                                                               | 0.00                           | 0.00                    | 0.00                         | 0.00                      | 0.00                | 0.00                         |
| TDMAT---HXR (Adduct)                                                                            | -1.45                          | -3.12                   | -4.99                        | -0.94                     | 0.37                | -0.50                        |
| TDMAT---H--<br>XR(Transition)                                                                   | 25.02                          | 15.62                   | 4.80                         | 28.45                     | 16.96               | -1.73                        |
| Ti(N(CH <sub>3</sub> ) <sub>2</sub> ) <sub>3</sub> -RX--H--<br>N(CH <sub>3</sub> ) <sub>2</sub> | -0.27                          | -6.23                   | -8.29                        | 1.20                      | -1.14               | 21.24                        |
| Ti(N(CH <sub>3</sub> ) <sub>2</sub> ) <sub>3</sub> RX<br>+HN(CH <sub>3</sub> ) <sub>2</sub>     | 1.52                           | -3.32                   | -5.41                        | 4.06                      | -0.28               | -1.58                        |

Figure 7

| Pathway           | Isopropylaniline |       |       | Aniline |
|-------------------|------------------|-------|-------|---------|
|                   | 2                | 4     | 3     | 3       |
| Reactant          | 0.00             | 0.00  | 0.00  | 0.00    |
| Activated complex | 30.96            | 37.17 | 38.75 | 43.02   |
| Adduct            | 16.08            | 21.67 | 21.59 | 22.56   |
| Product           | 36.00            | 26.00 | 39.92 | 47.80   |

Figure 8

| Complex<br>Pathway | Isopropylaniline |       |       | Aniline | Isobutylaniline |
|--------------------|------------------|-------|-------|---------|-----------------|
|                    | 2                | 4     | 3     | 3       | 4               |
| Reactant           | 0.00             | 0.00  | 0.00  | 0.00    | 0.00            |
| Activated complex  | 30.96            | 37.17 | 38.75 | 43.02   | 33.74           |
| Adduct             | 16.08            | 21.67 | 21.59 | 22.56   | 18.60           |
| Product            | 36.00            | 26.00 | 39.92 | 47.80   | 19.19           |
| Imine-product      |                  | 49.00 |       |         | 27.69           |
